# Supplementary material for: A time-resolved proteotranscriptomics atlas of the human placenta reveals pan-cancer immunomodulators
Source: PubMed Central journal article supplement (PMC7327038; doi:10.1038/s41392-020-00224-5), 2020-06-30
Supplement: 41392_2020_224_MOESM3_ESM.pdf [file 41392_2020_224_MOESM3_ESM.pdf]

| Uniprot.ID | Gene.symbol | Dif_placenta_Label | Cancer_Label | Drug.ID                                                                                                                                                                                              |
|------------|-------------|--------------------|--------------|------------------------------------------------------------------------------------------------------------------------------------------------------------------------------------------------------|
| O14672     | ADAM10      | up                 | seldom       | DB04991                                                                                                                                                                                              |
| O95865     | DDAH2       | down               | seldom       | DB00155                                                                                                                                                                                              |
| P12821     | ACE         | down               | seldom       | DB00178; DB00492; DB00519;<br>DB00542; DB00584; DB00616;<br>DB00691; DB00722; DB00790;<br>DB00881; DB00886; DB01180;<br>DB01197; DB01340; DB01348;<br>DB02032; DB03740; DB08836;<br>DB09477; DB13166 |
| P28676     | GCA         | down               | seldom       | DB11093; DB11348; DB14481                                                                                                                                                                            |
| AGPAT5     | Q9NUQ2      | up                 | seldom       |                                                                                                                                                                                                      |
| CASKIN2    | Q8WXE0      | down               | seldom       |                                                                                                                                                                                                      |
| CGA        | P01215      | up                 | seldom       |                                                                                                                                                                                                      |
| CLTB       | P09497      | down               | seldom       |                                                                                                                                                                                                      |
| LEP        | P41159      | up                 | seldom       |                                                                                                                                                                                                      |
| O14791     | APOL1       | down               | pan-cancer   | DB01593; DB14487; DB14533                                                                                                                                                                            |
| P00352     | ALDH1A1     | down               | pan-cancer   | DB00157; DB00162; DB00755;<br>DB04447                                                                                                                                                                |
| P00488     | F13A1       | down               | pan-cancer   | DB01839; DB02340; DB11300;<br>DB11311; DB11571; DB11572;<br>DB13151                                                                                                                                  |
| P01023     | A2M         | down               | pan-cancer   | DB00102; DB00515; DB00626;<br>DB01593; DB08888; DB12965;<br>DB14487; DB14533                                                                                                                         |
| P02746     | C1QB        | down               | pan-cancer   | DB00002; DB00005; DB00054;<br>DB00056; DB00072; DB00074;<br>DB00075; DB00078; DB00081;<br>DB00087; DB00092; DB00095;<br>DB00108; DB00110; DB00111;<br>DB00112; DB01593; DB14487;<br>DB14533          |
| P10636     | MAPT        | down               | pan-cancer   | DB00448; DB00637; DB01229;<br>DB01248                                                                                                                                                                |
| P19801     | AOC1        | down               | pan-cancer   | DB00594; DB01373; DB03608                                                                                                                                                                            |
| P31323     | PRKAR2B     | down               | pan-cancer   | DB02527                                                                                                                                                                                              |
| P35749     | MYH11       | down               | pan-cancer   | DB04444                                                                                                                                                                                              |
| P37840     | SNCA        | down               | pan-cancer   | DB02709; DB09130                                                                                                                                                                                     |
| P68871     | HBB         | down               | pan-cancer   | DB00893; DB01593; DB02126;<br>DB06154; DB07427; DB07428;<br>DB07645; DB08077; DB08262;<br>DB08486; DB08632; DB09112;<br>DB09130; DB09140; DB09147;<br>DB09517; DB13995; DB14487;<br>DB14533          |
| Q13938     | CAPS        | down               | pan-cancer   | DB11093; DB11348; DB14481                                                                                                                                                                            |
| Q8TD30     | GPT2        | up                 | pan-cancer   | DB00114; DB00142; DB00160;<br>DB00780                                                                                                                                                                |
| Q9BZZ2     | SIGLEC1     | down               | pan-cancer   | DB02379; DB03721                                                                                                                                                                                     |
| Q9Y617     | PSAT1       | up                 | pan-cancer   | DB00114; DB00142                                                                                                                                                                                     |
| ABLIM1     | O14639      | down               | pan-cancer   |                                                                                                                                                                                                      |

|         |          |      |            |                                                                                                                                                                                    |
|---------|----------|------|------------|------------------------------------------------------------------------------------------------------------------------------------------------------------------------------------|
| BGN     | P21810   | down | pan-cancer |                                                                                                                                                                                    |
| CD34    | P28906   | down | pan-cancer |                                                                                                                                                                                    |
| CLIC5   | Q9NZA1   | down | pan-cancer |                                                                                                                                                                                    |
| CRYAB   | P02511   | down | pan-cancer |                                                                                                                                                                                    |
| DPT     | Q07507   | down | pan-cancer |                                                                                                                                                                                    |
| ECM1    | Q16610   | down | pan-cancer |                                                                                                                                                                                    |
| EHD2    | Q9NZN4   | down | pan-cancer |                                                                                                                                                                                    |
| FAM3B   | P58499   | up   | pan-cancer |                                                                                                                                                                                    |
| GIMAP8  | Q8ND71   | down | pan-cancer |                                                                                                                                                                                    |
| GRB14   | Q14449   | down | pan-cancer |                                                                                                                                                                                    |
| HK3     | P52790   | down | pan-cancer |                                                                                                                                                                                    |
| HOMER3  | Q9NSC5   | down | pan-cancer |                                                                                                                                                                                    |
| INHA    | P05111   | up   | pan-cancer |                                                                                                                                                                                    |
| MMRN1   | Q13201   | down | pan-cancer |                                                                                                                                                                                    |
| PRELP   | P51888   | down | pan-cancer |                                                                                                                                                                                    |
| SDF2L1  | Q9HCN8   | up   | pan-cancer |                                                                                                                                                                                    |
| SH3BGRL | O75368   | down | pan-cancer |                                                                                                                                                                                    |
| SMPDL3B | Q92485   | up   | pan-cancer |                                                                                                                                                                                    |
| SNCG    | O76070   | down | pan-cancer |                                                                                                                                                                                    |
| SPARCL1 | Q14515   | down | pan-cancer |                                                                                                                                                                                    |
| SVEP1   | Q4LDE5   | down | pan-cancer |                                                                                                                                                                                    |
| TNS2    | Q63HR2   | down | pan-cancer |                                                                                                                                                                                    |
| WWTR1   | Q9GZV5   | down | pan-cancer |                                                                                                                                                                                    |
| LVRN    | Q6Q4G3   | down | pan-cancer |                                                                                                                                                                                    |
| P02745  | C1QA     | down | moderate   | DB00002; DB00005; DB00054; DB00056; DB00072; DB00074; DB00075; DB00078; DB00081; DB00087; DB00092; DB00095; DB00108; DB00110; DB00111; DB00112                                     |
| P04275  | VWF      | down | moderate   | DB00025; DB05202; DB06081; DB09108; DB09329; DB11606; DB11607; DB13998; DB13999                                                                                                    |
| P05121  | SERPINE1 | down | moderate   | DB00009; DB00013; DB00015; DB00029; DB00031; DB00055; DB00197; DB05254; DB09130                                                                                                    |
| P05187  | ALPP     | down | moderate   | DB01373; DB08413                                                                                                                                                                   |
| P05362  | ICAM1    | down | moderate   | DB00108; DB08818; DB12598                                                                                                                                                          |
| P07332  | FES      | down | moderate   | DB12010                                                                                                                                                                            |
| P22694  | PRKACB   | down | moderate   | DB02482; DB12010                                                                                                                                                                   |
| P23284  | PPIB     | up   | moderate   | DB00172; DB04447                                                                                                                                                                   |
| P28062  | PSMB8    | down | moderate   | DB08889                                                                                                                                                                            |
| P28065  | PSMB9    | down | moderate   | DB08889                                                                                                                                                                            |
| P28845  | HSD11B1  | down | moderate   | DB00157; DB00635; DB02329; DB03461; DB03814; DB04652; DB05064; DB06992; DB07017; DB07049; DB07056; DB07310; DB07316; DB07619; DB07624; DB07866; DB08277; DB08280; DB08771; DB13751 |

|          |         |      |          |                                                                                                                                                                           |
|----------|---------|------|----------|---------------------------------------------------------------------------------------------------------------------------------------------------------------------------|
| P29466   | CASP1   | down | moderate | DB01017; DB04875; DB05301; DB05408; DB05507; DB07733; DB07744; DB07916                                                                                                    |
| P31994   | FCGR2B  | down | moderate | DB00002; DB00005; DB00028; DB00054; DB00056; DB00072; DB00074; DB00075; DB00078; DB00081; DB00087; DB00092; DB00095; DB00098; DB00108; DB00110; DB00111; DB00112; DB11767 |
| P33151   | CDH5    | down | moderate | DB00480; DB05685                                                                                                                                                          |
| P33402   | GUCY1A2 | down | moderate | DB00435; DB01020; DB08931; DB09241; DB09282; DB13170                                                                                                                      |
| P40261   | NNMT    | down | moderate | DB00627                                                                                                                                                                   |
| P42768   | WAS     | down | moderate | DB01731                                                                                                                                                                   |
| P53004   | BLVRA   | down | moderate | DB00157                                                                                                                                                                   |
| P68366   | TUBA4A  | down | moderate | DB00541; DB01179; DB01873; DB03010; DB05147; DB05281; DB06772; DB12695                                                                                                    |
| Q14012   | CAMK1   | down | moderate | DB12010                                                                                                                                                                   |
| Q15125   | EBP     | up   | moderate | DB00675                                                                                                                                                                   |
| Q8N142   | ADSSL1  | down | moderate | DB00128; DB02109; DB03510; DB04137; DB04315; DB04418; DB04566; DB05540                                                                                                    |
| ADPRH    | P54922  | down | moderate |                                                                                                                                                                           |
| AIF1     | P55008  | down | moderate |                                                                                                                                                                           |
| ANGPT2   | O15123  | up   | moderate |                                                                                                                                                                           |
| C11orf96 | Q7Z7L8  | down | moderate |                                                                                                                                                                           |
| CD63     | P08962  | up   | moderate |                                                                                                                                                                           |
| CRIP2    | P52943  | down | moderate |                                                                                                                                                                           |
| DHRS2    | Q13268  | down | moderate |                                                                                                                                                                           |
| DOK2     | O60496  | down | moderate |                                                                                                                                                                           |
| ENG      | P17813  | up   | moderate |                                                                                                                                                                           |
| FERMT3   | Q86UX7  | down | moderate |                                                                                                                                                                           |
| FGD4     | Q96M96  | down | moderate |                                                                                                                                                                           |
| FKBP11   | Q9NYL4  | up   | moderate |                                                                                                                                                                           |
| GDA      | Q9Y2T3  | down | moderate |                                                                                                                                                                           |
| GIMAP4   | Q9NUV9  | down | moderate |                                                                                                                                                                           |
| GMFG     | O60234  | down | moderate |                                                                                                                                                                           |
| HECW2    | Q9P2P5  | down | moderate |                                                                                                                                                                           |
| IFIT3    | O14879  | down | moderate |                                                                                                                                                                           |
| INPP1    | P49441  | down | moderate |                                                                                                                                                                           |
| ITGA3    | P26006  | down | moderate |                                                                                                                                                                           |
| KANK3    | Q6NY19  | down | moderate |                                                                                                                                                                           |
| LAMB2    | P55268  | down | moderate |                                                                                                                                                                           |
| LCP2     | Q13094  | down | moderate |                                                                                                                                                                           |
| LSP1     | P33241  | down | moderate |                                                                                                                                                                           |
| MMRN2    | Q9H8L6  | down | moderate |                                                                                                                                                                           |
| NOL3     | O60936  | down | moderate |                                                                                                                                                                           |
| PARP10   | Q53GL7  | down | moderate |                                                                                                                                                                           |

|        |        |      |          |
|--------|--------|------|----------|
| RGCC   | Q9H4X1 | down | moderate |
| RRAD   | P55042 | down | moderate |
| SAMHD1 | Q9Y3Z3 | down | moderate |
| SHANK3 | Q9BYB0 | down | moderate |
| SNTB1  | Q13884 | down | moderate |
| TPPP3  | Q9BW30 | down | moderate |

---
